# Supplementary material
Source: PubMed Central journal article supplement (PMC3494264)
Supplement: supp_M031773_jlr.M031773-1.pdf [file supp_M031773_jlr.M031773-1.pdf]

## Supplementary materials

**TGF $\beta$ -SMAD3 signal is involved in hepatic phospholipid and bile acid metabolism following lithocholic acid-induced liver injury.**

Tsutomu Matsubara, Naoki Tanaka, Misako Sato, Dong Wook Kang, Kristopher W. Krausz, Kathleen C. Flanders, Kazuo Ikeda, Hans Luecke, Lalage M. Wakefield, and Frank J. Gonzalez

### ***Synthesis of bile salts***

1. Tauromurideoxycholate: C-6 alcohol's selective oxidation of hydoxycholic acid methyl ester was converted to 6-oxo-lithocholic acid methyl ester with potassium chromate in acetic acid. 6-Oxo-lithocholic acid methyl ester was reduced to 6 $\alpha$ -alcohol with sodium borohydride and palladium chloride in methanol. Continuously, this 6 $\alpha$ -hydroxy-lithocholic acid methyl ester was hydrolyzed with 5% methanolic potassium hydroxide to murideoxycholic acid.<sup>1</sup> The taurine conjugate was prepared via the pentafluorophenyl ester intermediate. Murideoxycholic acid was treated with pentafluorophenol, 1-(3-dimethylaminopropyl)-3-ethylcarbodiimide hydrochloride, and catalytic amount of N,N-dimethylformamide in methanol to obtain its pentafluorophenyl ester intermediate which was reacted with taurine and 1,8-diazabicyclo[5,4,0]undec-7-ene in methylene chloride to afford tauromurideoxycholate (TMDC). The synthesized chemical was confirmed with <sup>1</sup>H-nuclear magnetic resonance (<sup>1</sup>H-NMR, Supplementary figure 4A) and high-resolution mass spectrometry (MS, Supplementary figure 4B).

2. Tauro-5 $\beta$ -cholanolic acid-3-one: tauro-5 $\beta$ -cholanolic acid-3-one (T3KL) was prepared from 5 $\beta$ -cholanolic acid-3-one (3-ketolithocholic acid, Sigma-Aldrich) using the same method as tauromurideoxycholate synthesis from murideoxycholic acid. The synthesized chemical was confirmed by <sup>1</sup>H-NMR and MS (Supplementary figure 4C and 4D).

### ***Microsomal assay***

To measure bile acid hydroxylase activities, reaction mixtures consisting of 50  $\mu$ g of liver microsomal protein 100 mM Tris buffer (pH 7.4) and bile acids (substrate), were made in a total volume of 75  $\mu$ L. The reaction was started by the addition of NADPH to a final concentration of 1 mM, incubated at 37°C for 30 min, and terminated by the addition of 75  $\mu$ L of acetonitrile

including 1  $\mu$ M dehydrocholic acid as an internal standard. After vortexing, the reaction mix was centrifuged at 18,000g for 15 min and the supernatant subjected to UPLC-ESI-QTOFMS.

### Supplementary Table 1. Sequences of qPCR primers.

This table shows oligonucleotides for qPCR used in this study.

#### (A) Mouse primer sets

| Gene           | Forward (5' to 3')     | Reverse (5' to 3')     |
|----------------|------------------------|------------------------|
| 18S            | ATTGGAGCTGGAATTACCGC   | CGGCTACCACATCCAAGGAA   |
| Tgfb1          | TCGAGGGCGAGAGAAGTTTA   | AAAAGAATGTCCCGGCTCTC   |
| Tgfr1          | CTCCTCATCGTGTGGTGG     | GCAAAGACCATCTGTCTCACA  |
| Tgfr2          | GTCGGATGTGAAATGGAAG    | CTGGCCATGACATCACTGTT   |
| Tgfr3          | AGGAGGTGAAAGTCCCCG     | AGTAGCCCAGACGAGTCCC    |
| Cyp3a11        | TTCTGTCTTCACAAACCGGC   | GGGGACAGCAAAGCTCTAT    |
| Sult2a*        | GAAGAATCCAGGGTCACTCG   | CATTCTCTCATGGACAGCCA   |
| Slco1a1        | ACTCCATAATGCCCTTGG     | TAATCGGGCCAACAATCTTC   |
| Slco1a4        | CCCAGAGCTCTCCAGTTTTG   | TCCCATGTTGTTCTTCTGATTG |
| Slco1b2        | ACCAAACCTCAGCATCCAAGC  | TAGCTGAATGAGAGGGCTGC   |
| Slc10a1        | CTTGCGCCATAGGGATCTTC   | GACAGCCACAGAGAGGGAGAA  |
| Abcc2          | TCCAGGACCAAGAGATTTGC   | TCTGTGAGTGCAAGAGACAGGT |
| Abcb11         | ACAGAAGCAAAGGGTAGCCATC | GGTAGCCATGTCCAGAAGCAG  |
| Ost $\alpha$   | AATTACAGCATCTCCCCTGC   | GGTCAAGATGATGGTGAGGG   |
| Ost $\beta$    | AGAGAAAGCTGCAGCCAATG   | CCAGGACCAGGATGGAATAA   |
| Abcc1          | GATGGCTCCGATCCACTCT    | AGGTAGAAACAAGGCACCCA   |
| Abcc3          | GGGCTCCAAGTTCTGGGAC    | CCGTCTTGAGCCTGGATAAC   |
| Abcc4          | AGCTTCAACGGTACTGGGATA  | TCGTGCGGGTCATACTTCTC   |
| Abcc5          | GCCCTGGGTACAGAAGTGAC   | TCTTGGCATTCCAACGATCT   |
| Lpcat1         | CACGAGCTGCGACTGAGC     | ATGAAAGCAGCGAACAGGAG   |
| Lpcat2         | ACCTGTTTCCGATGTCCTGA   | CCAGGCCGATCACATACTCT   |
| Lpcat3         | AGCCTTAACAAGTTGGCGAC   | ATGCCGGTAAAACAGAGCC    |
| Lpcat4         | GAGTTACACCTCTCCGGCCT   | GGCCAGAGGAGAAAGAGGAC   |
| Lypla1         | CCTTCACGGATTGGGAGATA   | GGGGCATGTGGACAGATGTA   |
| Enpp2          | TCGAGGGCGAGAGAAGTTTA   | AAAAGAATGTCCCGGCTCTC   |
| Pld1           | CTGCATCCTCAAACGGAAAG   | GCTTGCTGTACTCGCTGTTG   |
| Pld2           | CAGCTACATCAGCATGACAGC  | CTGCCACAGCAGCAAAGTAA   |
| Chk $\alpha$   | AAAGTGCTCTTGCGGCTCTA   | GACCTCTCTGCAAGAATGGC   |
| Chk $\beta$    | GCAGAGGTTCAGAAGGGTGA   | CCCCAGAAAAGTGAGATGC    |
| Pcyt1 $\alpha$ | AGCCCTATGTCAGGGTGACT   | GGCATGACCAGAGTGAAACA   |
| Pcyt1 $\beta$  | ATAGAGCACACATGCCACA    | GGCAACGGTCAGTTTTTCAT   |

\*Sult2a primer set should detect both Sult2a1 and Sult2a2.

(B) Human primer sets

| <b>Gene</b> | <b>Forward (5' to 3')</b> | <b>Reverse (5' to 3')</b> |
|-------------|---------------------------|---------------------------|
| 18S         | CAGCCACCCGAGATTGAGCA      | TAGTAGCGACGGGCGGTGTG      |
| OST $\beta$ | GAGCTGCTGGAAGAGATGCT      | TGCTTATAATGACCACCACAGC    |
| LPCAT4      | CCCTTCGTGCATGAGTTACA      | ATAAAGGCCAGAAGCACTCG      |

### Supplementary figure 1

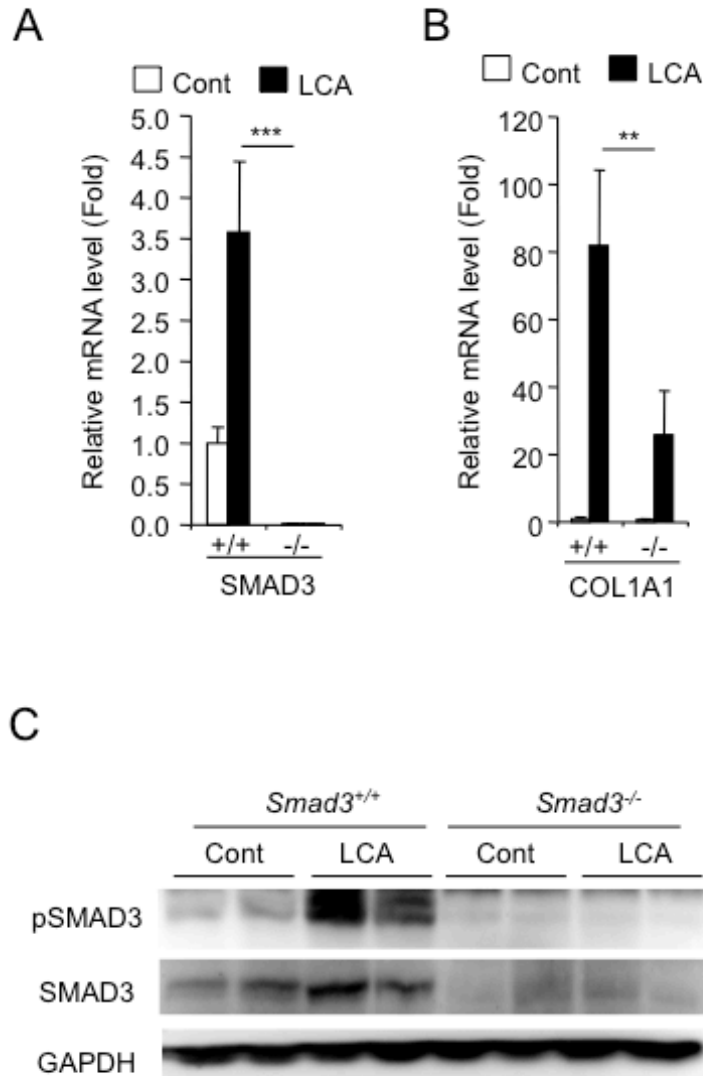

#### Supplementary figure 1. TGF- $\beta$ -SMAD3 signal in *Smad3*-null mice after LCA exposure.

qPCR analysis of hepatic SMAD3 (A) and COL1A1 (B) expression. qPCR analysis was performed with primers; SMAD3 sense 5'-GCT GCC CTC CTA GCT CAG TC-3', SMAD3 antisense 5'-GGT GCT GGT CAC TGT CTG TC-3', COL1A1 sense 5'-ACA TGT TCA GCT TTG TGG ACC-3', and COL1A1 antisense 5'-TAG GCC ATT GTG TAT GCA GC-3'. Samples were normalized to 18S ribosomal RNA. Significance was determined by one way-ANOVA with Bonferroni's test (\*\*,  $P < 0.01$ ; \*\*\*,  $P < 0.001$ ). (C) Western blotting of hepatic SMAD3 phosphorylation. Proteins were detected with antibody against SMAD3 (1:1000, ab28379, Abcam) and phospho-SMAD3 (1:1000, Epitomics Cat. No. 1880-1). The signals were normalized to GAPDH (1:10,000, MAB374, Millipore, Billerica, MA).

## Supplementary figure 2

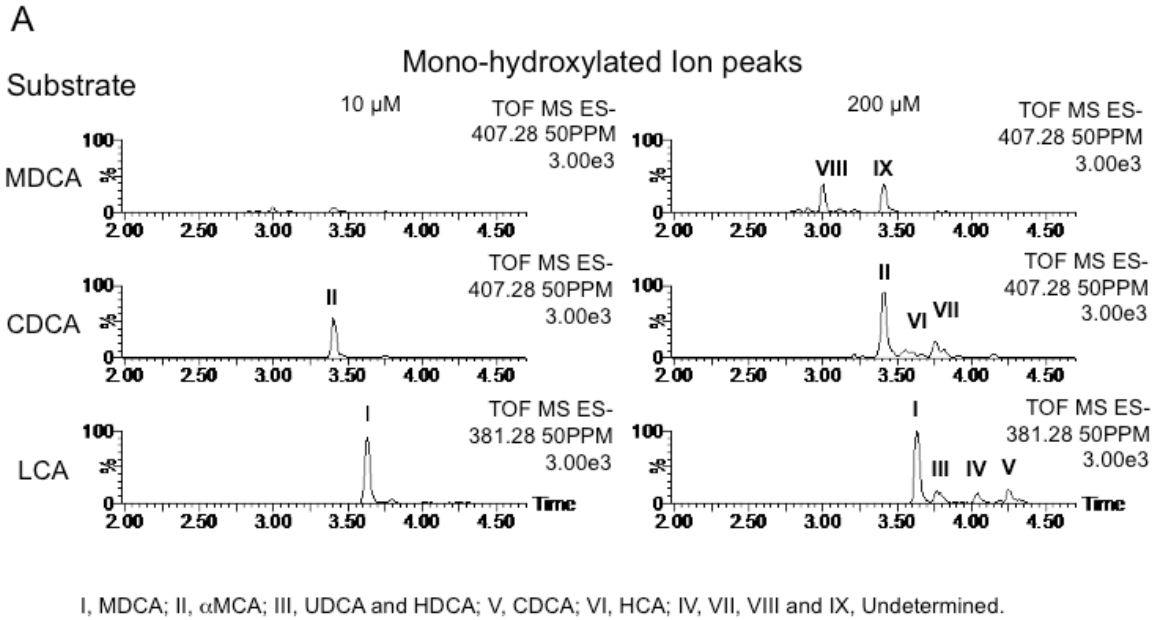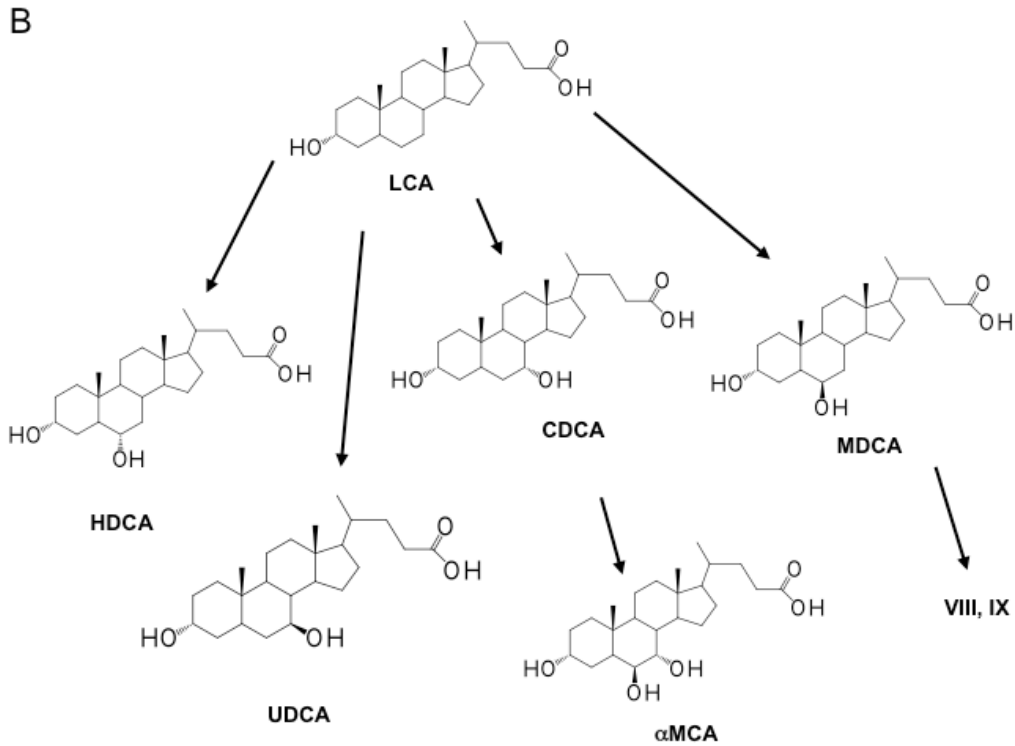

### Supplementary figure 2. Microsomal hydroxylation of bile acid in mouse livers.

(A) UPLC-ESI-QTOFMS of bile acid metabolites after hepatic microsomal mono-hydroxylation assays. (B) Putative metabolic pathway of LCA in mouse liver.

### Supplementary figure 3

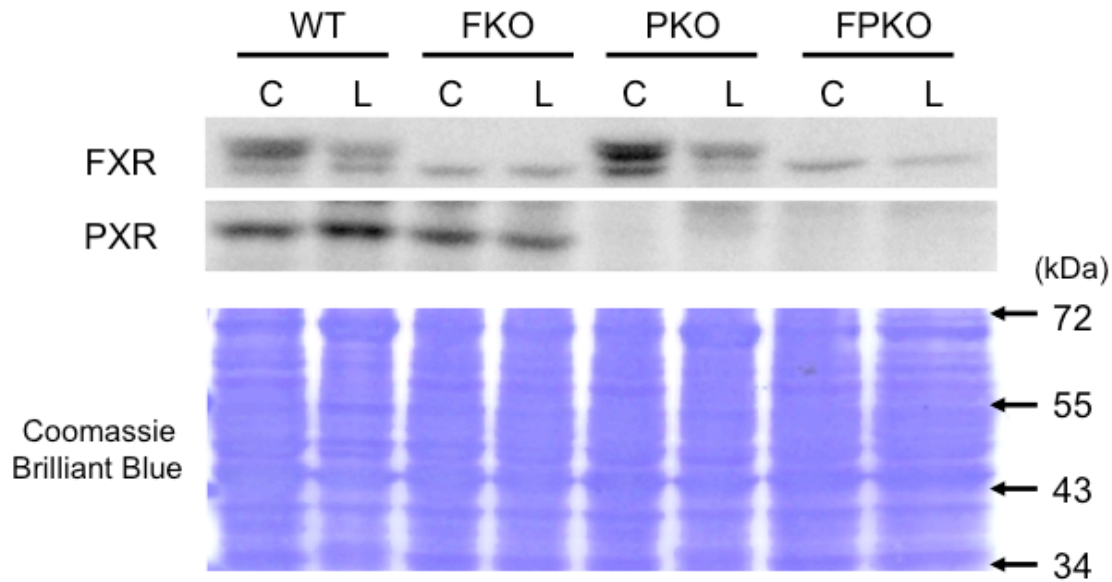

**Supplementary figure 3. Nuclear FXR level is attenuated after LCA exposure, but the pregnane X receptor is not.**

A nuclear fraction was prepared with NE-PER<sup>®</sup> Nuclear Protein Extraction Kit (Thermo Fisher Scientific, Waltham, MA), and subjected to western blotting. The samples were boiled for 5 min and then separated and transferred to PVDF membranes using standard western blotting techniques. The membranes were incubated with an antibody against FXR at a dilution of 1:1,000 (sc13063 H-130, Santa Cruz Biology, Inc) or PXR at a dilution of 1:1,000 (generously provided by Toshiya Tanaka and Tatsuhiko Kodama, University of Tokyo). WT, wild-type; FKO, *Fxr*-null; PKO, *Pxr*-null; FPKO, *Fxr*- and *Pxr*-null; C, control diet (AIN93G); L, LCA-supplemented diet.



## Supplementary figure 4

A. TMDC-<sup>1</sup>H-NMR

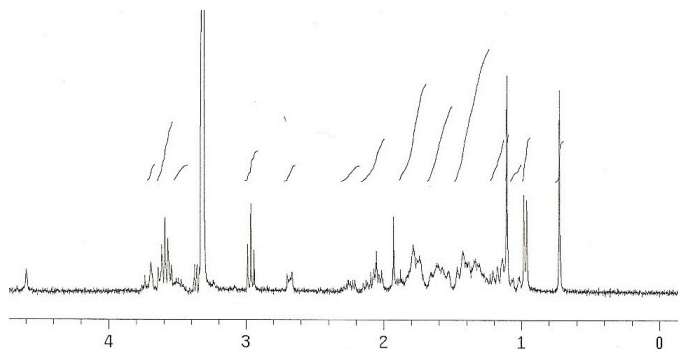

B. TMDC-MS

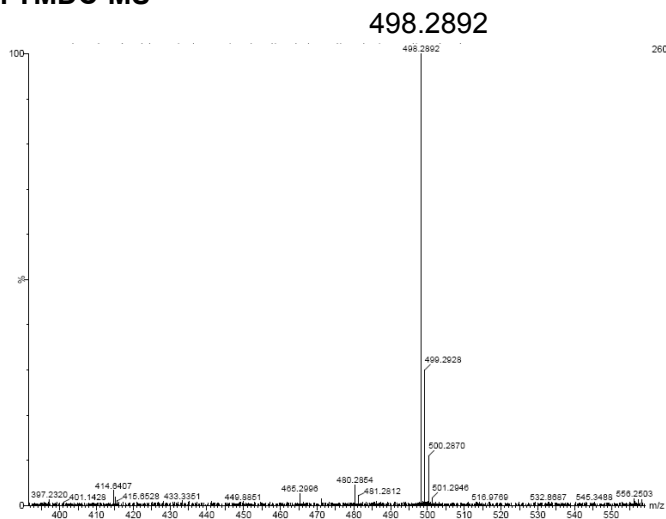

C. T3KL-<sup>1</sup>H-NMR

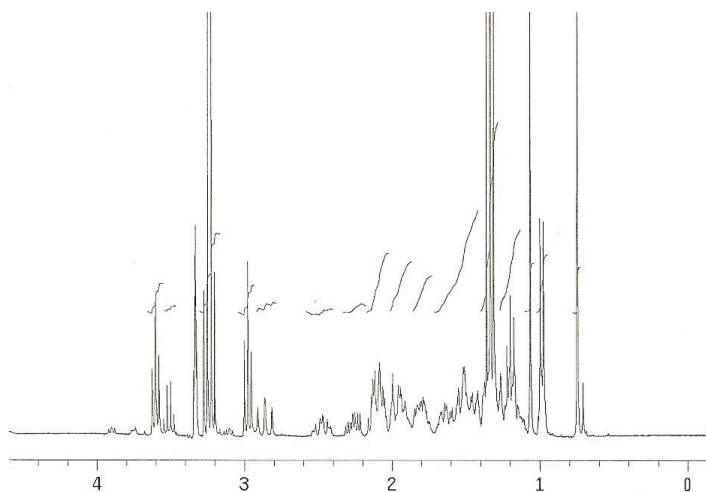

D. T3KL-MS

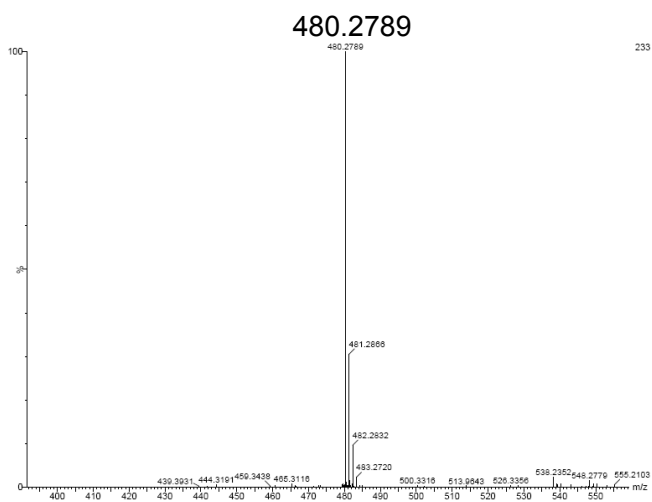

**Supplementary figure 4. <sup>1</sup>H-nuclear magnetic resonance (<sup>1</sup>H-NMR) and high-resolution mass spectrometry (MS) of the synthesized chemicals**

<sup>1</sup>H-NMR (A) and MS (B) of taumurideoxycholate (TMDC) and <sup>1</sup>H-NMR (C) and MS (D) of touro-5 $\beta$ -cholanolic acid-3-one (T3KL).
